# Supplementary material
Source: PubMed Central journal article supplement (PMC3496199)
Supplement: supp_1200761_12-00761_S1-4.pdf [file supp_1200761_12-00761_S1-4.pdf]

## Data Supplement

### Supplemental Figures

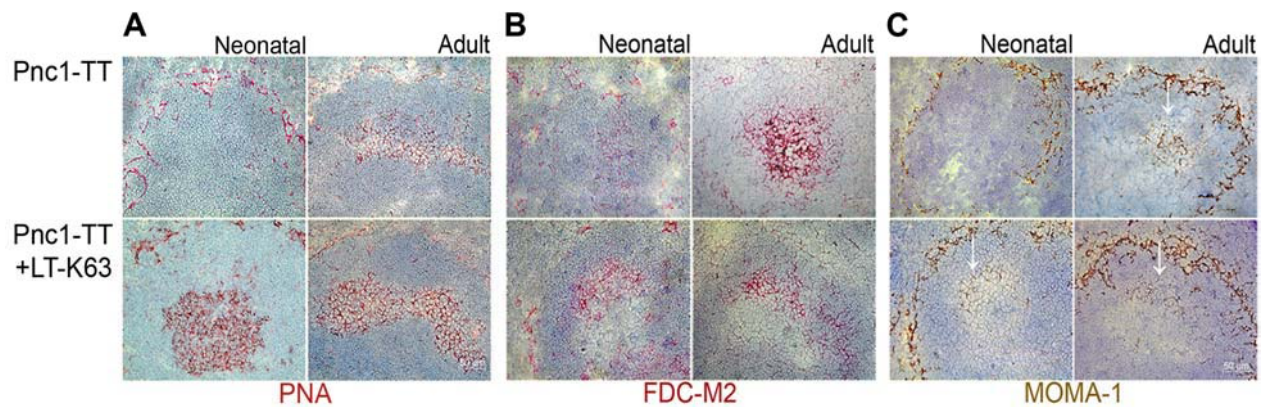

**Supplemental Figure 1. LT-K63 overcomes limited germinal center (GCs) induction in early life by accelerating the maturation of FDCs and migration of MOMA-1<sup>+</sup> MMM into activated GCs.**

To detect activated germinal centers, mature FDCs and marginal metallophilic macrophages spleen sections were stained with PNA (A), FDC-M2 (B), MOMA-1 (C), respectively, 14 or 10 days after priming of neonatal and adult mice with 0.5  $\mu$ g Pnc1-TT (upper panels) or 0.5  $\mu$ g Pnc1-TT with 5.0  $\mu$ g LT-K63 (lower panels). 7  $\mu$ m spleen sections were prepared from four different levels in the spleen, the first started 700  $\mu$ m into the tissue and the levels were separated by 210  $\mu$ m. One representative section from each group is shown. Magnification x40 and scale bar is 50  $\mu$ m. The results shown in A–D are from three experiments for neonatal and two experiments for adult mice (n=16 per group) with eight mice per group in each experiment.

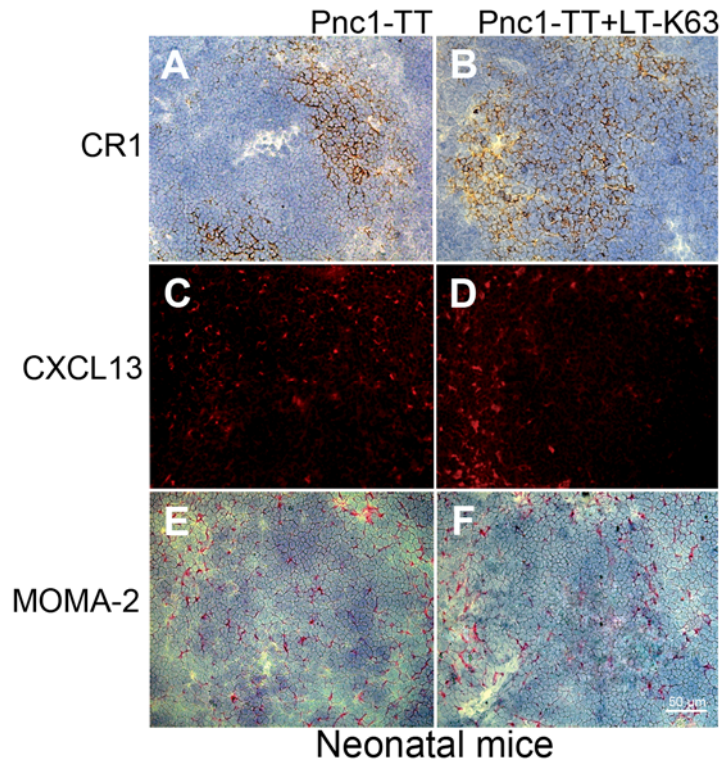

**Supplemental Figure 2. CR1<sup>+</sup>, CXCL13<sup>+</sup> FDC network and MOMA-2<sup>+</sup> macrophages were detected in mice immunized with Pnc1-TT as neonates.**

To detect mature FDCs spleen sections were stained with CR1 (top panel, A and B), anti-CXCL-13 (middle panel, C and D) and MOMA-2 (bottom panel, E and F) to detect C3 producing macrophages, 14 days after priming of neonatal with 0.5  $\mu$ g Pnc1-TT (left panel) or 0.5  $\mu$ g Pnc1-TT+5.0  $\mu$ g LT-K63 (right panel). 7  $\mu$ m spleen sections were prepared from four different levels in the spleen, the first started 700  $\mu$ m into the tissue and the levels were separated by 210  $\mu$ m. One representative section from each group is shown. Magnification x40 and scale bar is 50  $\mu$ m. The results shown in A–D are from three experiments for neonatal (n=24 per group) with eight mice per group in each experiment.

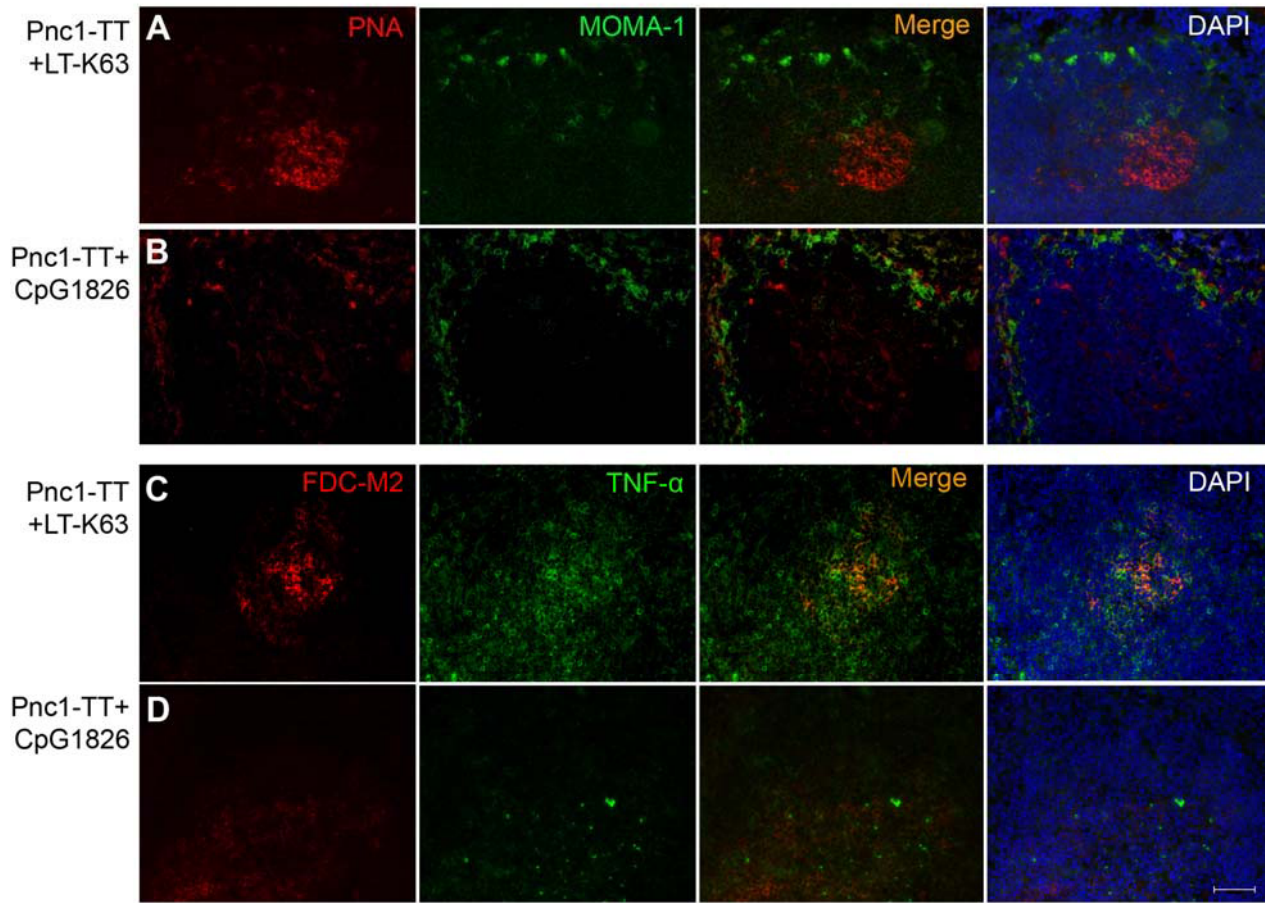

**Supplemental Figure 3. A weak TNF- $\alpha$  staining was detected in follicles 16 days after mice were immunized with Pnc1-TT+CpG1826 as neonates.**

Spleen sections were stained with (A and B) PNA (red), (A and B) MOMA-1 (green), (C and D) FDC-M2 (red), (C and D) Ab to TNF- $\alpha$  (green) or DAPI to visualize the nuclei (blue) 16 days after priming of neonatal mice with 0.5  $\mu$ g Pnc1-TT+5.0  $\mu$ g LT-K63 (A and C) or 0.5  $\mu$ g Pnc1-TT+20.0  $\mu$ g CpG1826 (B and D). 7  $\mu$ m spleen sections were prepared from four different levels in the spleen, the first started 700  $\mu$ m into the tissue and the levels were separated by 210  $\mu$ m. One representative section from each group is shown. Magnification x40 and scale bar is 50  $\mu$ m. Results shown in A–D are from two experiments in neonatal mice with 9 mice per group.

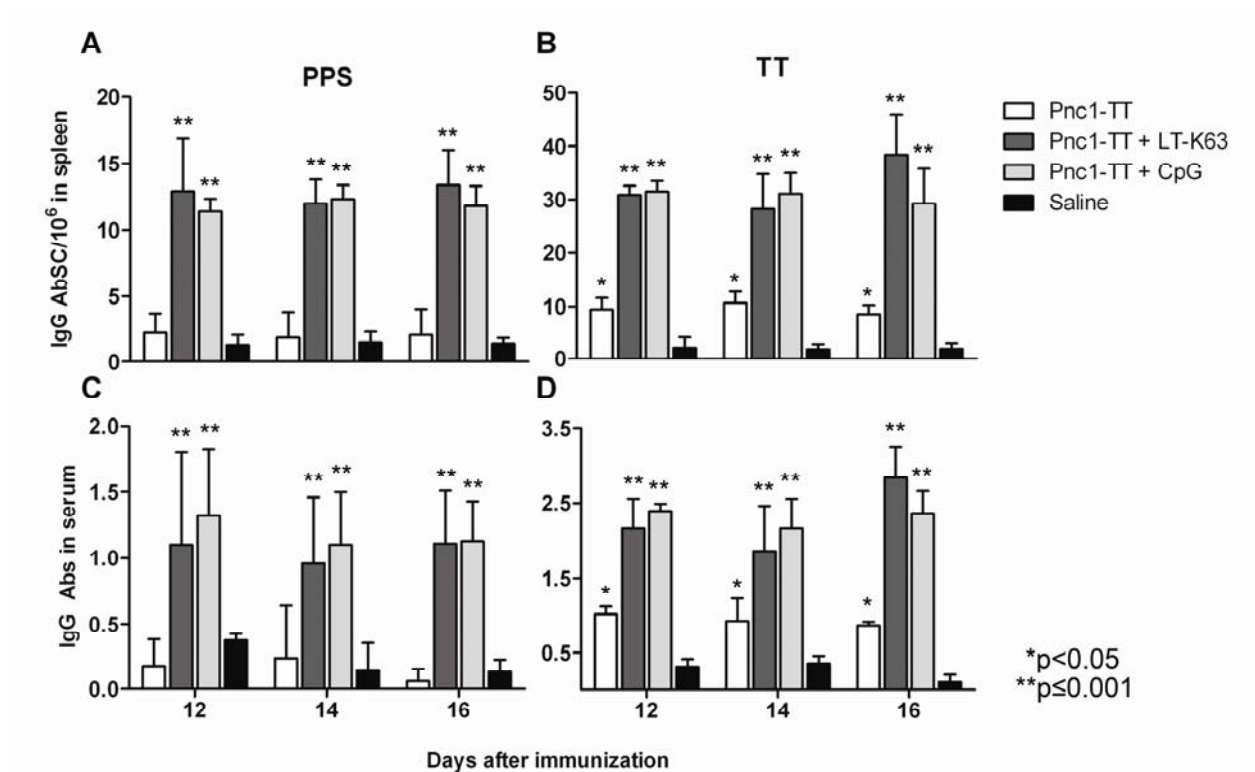

**Supplemental Figure 4. LT-K63 and CpG1826 enhanced vaccine specific IgG<sup>+</sup> AbSCs in spleen and Abs in serum when co-administered with Pnc1-TT in neonatal mice.**

PPS-1- and TT-specific IgG<sup>+</sup> AbSC measured by ELISPOT shown as number of spots (mean±SD) per 10<sup>6</sup> cells (A and B) and PPS-1- and TT-specific IgG levels (mean EU/mL±SD) in serum measured by ELISA (C and D). Results are shown for neonatal mice immunized with 0.5 µg Pnc1-TT alone (white column), with 5.0 µg of LT-K63 (dark grey column) or with 20 µg of CpG1826 (light grey column) or saline (black column). Statistical differences between test groups and control mice (that received saline) are shown; \* p<0.05; \*\* p≤ 0.001. Results in A–D are from one experiment with 9 mice per group.
